# Supplementary material for: Vaccination Against Lawsonia intracellularis Decreases Shedding of Salmonella enterica serovar Typhimurium in Co-Infected Pigs and Alters the Gut Microbiome
Source: PubMed Central journal article supplement (PMC5809363; doi:10.1038/s41598-018-21255-7), 2018-02-12
Supplement: 41598_2018_21255_MOESM1_ESM.pdf [file 41598_2018_21255_MOESM1_ESM.pdf]

**Supplementary Information**  
**Vaccination Against *Lawsonia intracellularis* Decreases Shedding of *Salmonella enterica* serovar Typhimurium in Co-Infected Pigs and Alters the Gut Microbiome**

Fernando L. L. Leite<sup>1</sup>, Randall S. Singer<sup>1</sup>, Tonya Ward<sup>2</sup>, Connie J. Gebhart<sup>1</sup>, Richard E. Isaacson<sup>1\*</sup>  
 1: Department of Veterinary and Biomedical Sciences, University of Minnesota, St. Paul, MN, USA  
 2: Biotechnology Institute, University of Minnesota, Minneapolis, MN, USA  
 \*: Corresponding Author, isaac015@umn.edu

Supplementary Figure S1. Experimental outline. Treatment groups: Sal= *S. Typhimurium* challenged; Sal Law= *S. Typhimurium*, *L. intracellularis* co-challenge; Sal Law Vac= *S. Typhimurium*, *L. intracellularis* co-challenge and *L. intracellularis* vaccination; Sal Vac= *S. Typhimurium* challenge and *L. intracellularis* vaccination. Each box represents an isolation room with the number of animals per room.

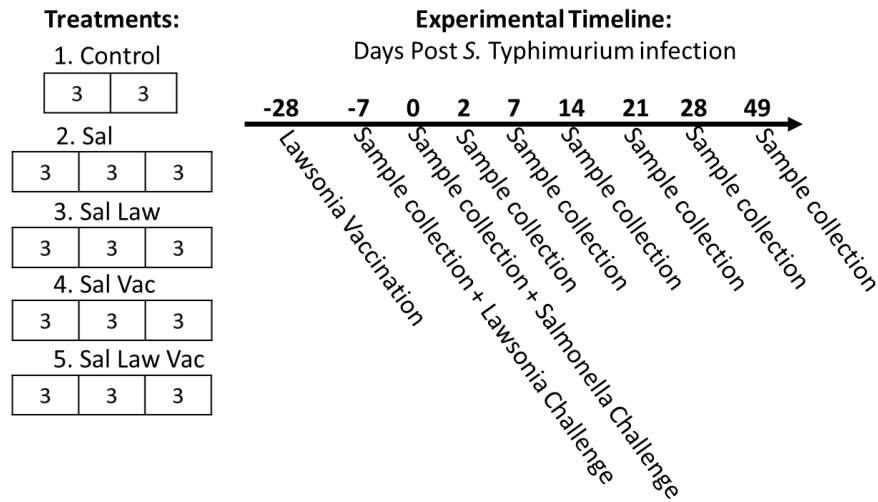

Supplementary Figure S2. Weighted UniFrac Distance between Control and Sal treatment groups at 0 a) and 14 days b) post *S. Typhimurium* challenge. Between is the distance between all samples in the comparison. Different letters indicate statistical significance (Wilcoxon rank-sum test  $p < 0.05$ ).

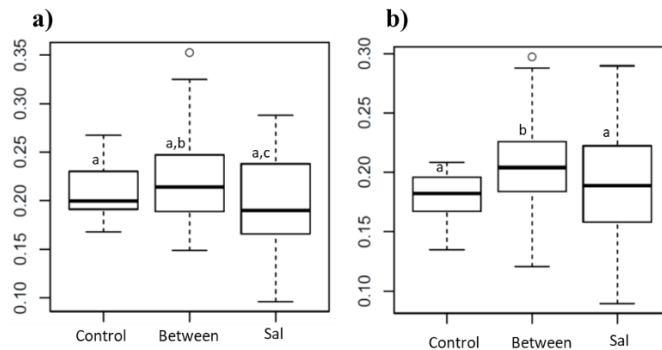

Supplementary Figure S3. Weighted UniFrac Distance between Control and Sal Law treatment group at 0 days post *S. Typhimurium* challenge (7 days post *L. intracellularis* challenge). Between is the distance between all samples in the comparison. Different letters indicate statistical significance (Wilcoxon rank-sum test  $p < 0.05$ ).

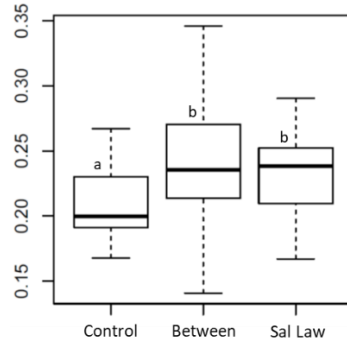

Supplementary Figure S4. Weighted UniFrac Distance between Sal Law and Sal Law Vac treatment group at 14 a) and 21 b) days post *S. Typhimurium* challenge. Between is the distance between all samples in the comparison. Different letters indicate statistical significance (Wilcoxon rank-sum test  $p < 0.05$ ).

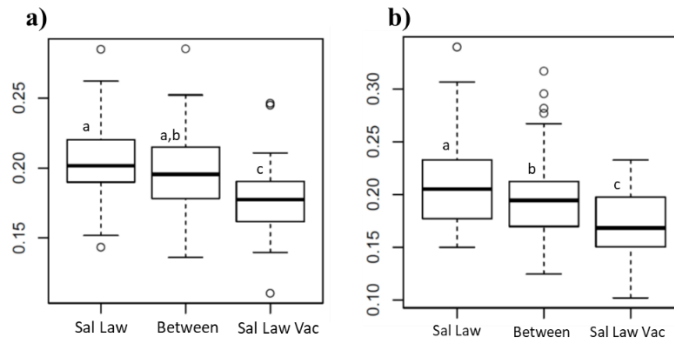

Supplementary Figure S5. Weighted UniFrac Distance between Sal and Sal Vac treatment group at 7 days post *S. Typhimurium* challenge. Between is the distance between all samples in the comparison. Different letters indicate statistical significance (Wilcoxon rank-sum test  $p < 0.05$ ).

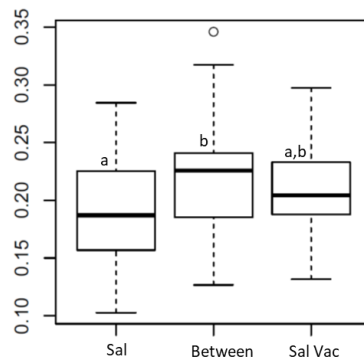

Supplementary Figure S6. Alpha diversity metrics of Chao 1 a) and number of observed OTUs b) at 7 days post *Salmonella enterica* serovar Typhimurium infection. No statistical significance (Wilcoxon rank-sum test  $p < 0.05$ ) observed between groups.

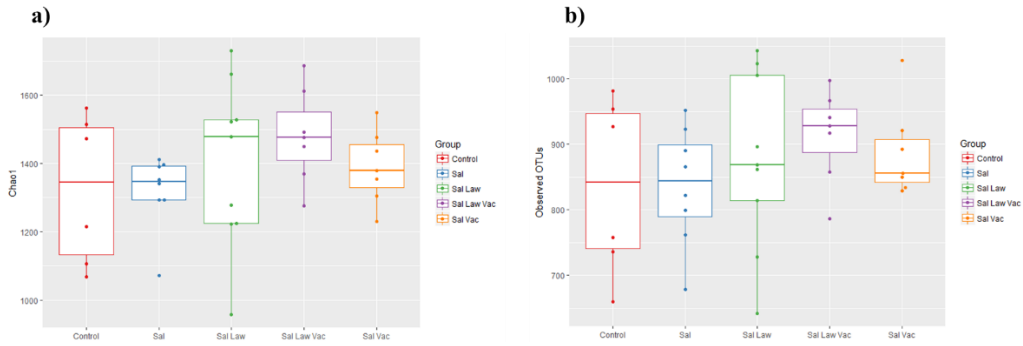

Supplementary Figure S7. Relative abundance of different phyla at 7 days post *Salmonella enterica* serovar Typhimurium infection.

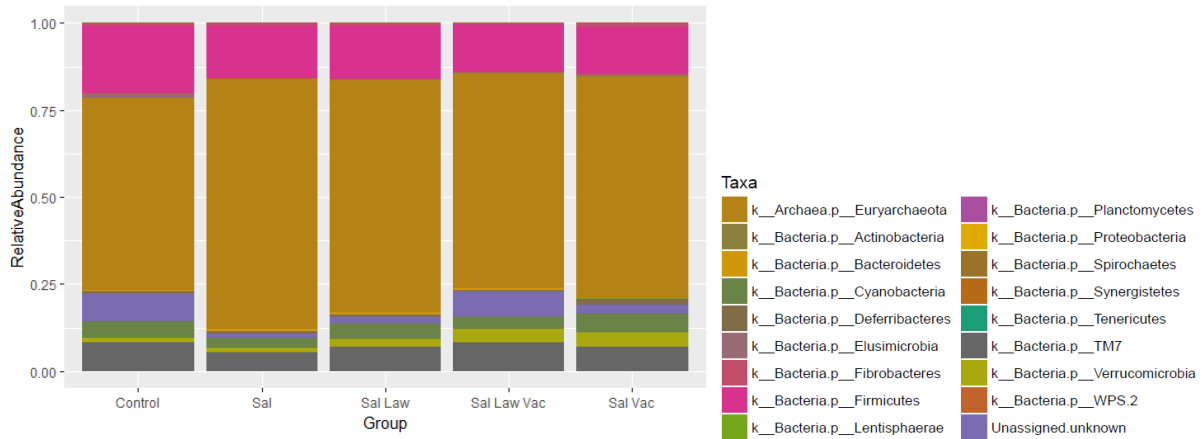

Supplementary Figure S8. Differentially abundant bacteria identified comparing different treatments at 0 days post *S. Typhimurium* infection. Each dot represents a different OTU identified within a genus. a) Control compared to Sal, a positive log fold change indicates enrichment in the Sal group (prior to challenge). b) Control compared to Sal Law, a positive log fold change indicates enrichment in the Sal Law group (only infected with *L. intracellularis* at this timepoint) ; c) Sal compared to Sal Law, a negative log fold change indicates decreased abundance in the Sal Law group (only infected with *L. intracellularis* at this timepoint); d) Sal Law compared Sal Law Vac, a positive log fold change indicates enrichment in the Sal Law Vac group associated with vaccination (only infected with *L. intracellularis* at this timepoint). \* = OTU sequences closely related to *Clostridium butyricum*.

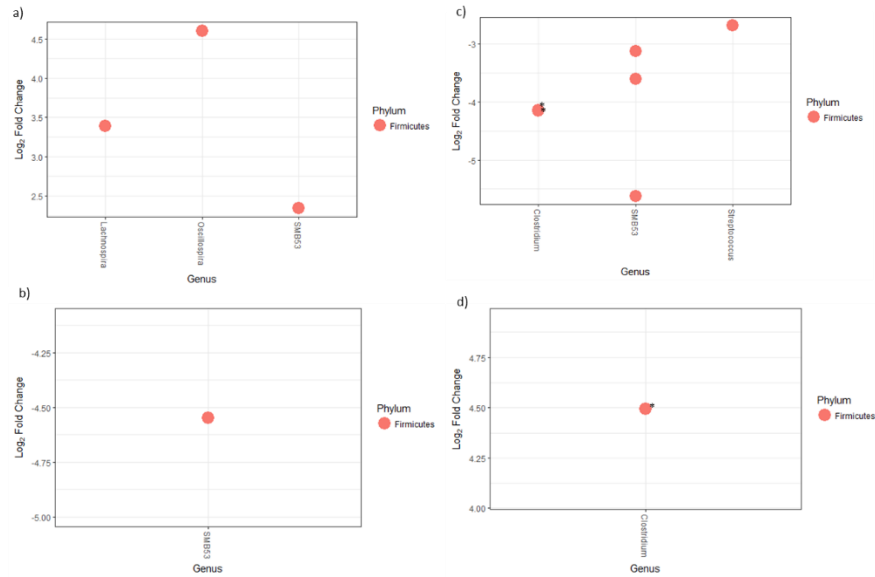

Supplementary Figure S9. Differentially abundant bacteria identified with *Lawsonia intracellularis* infection at day 0 prior to *S. Typhimurium* infection. The Sal Law group (only challenged with *L. intracellularis*) was compared to the Sal and Control groups (not challenged). A positive log fold change indicates enrichment with *L. intracellularis* infection. \* = OTU sequences closely related to *Clostridium butyricum*.

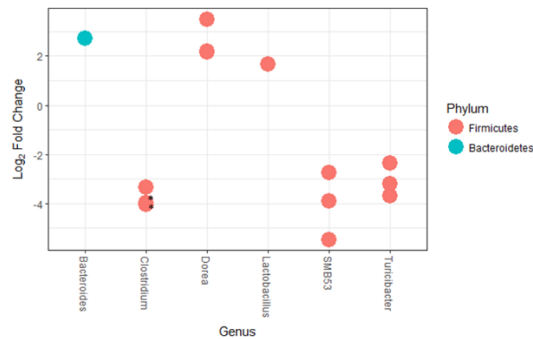

Supplementary Figure S10. Differentially abundant bacteria identified comparing different treatments at 7 days post *S. Typhimurium* infection. a) Sal compared to the Sal Vac group, a positive log fold change indicates enrichment with in the Sal Vac grup; b) Sal Law compared to the Sal Vac group, a positive log fold change indicates enrichment in the Sal Vac group. \* = OTU sequences closely related to *Clostridium butyricum*. OTU of *Prevotella* genus did not match to a species level.

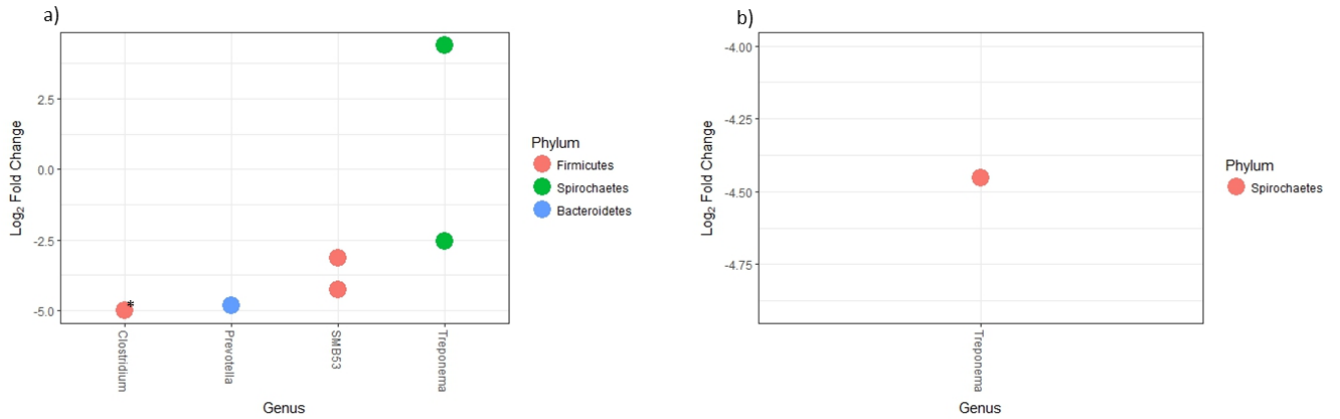

Supplementary Figure S11. The effect of live oral vaccination against *Lawsonia intracellularis* infection on the microbiome at timepoint 0 days post *S. Typhimurium* infection. The Sal Law group (only challenged with *L. intracellularis*) was compared to the Sal and Control groups at 0 days post *S. Typhimurium* infection. A positive log fold change indicates enrichment with vaccination. \* = OTU sequences closely related to *Clostridium butyricum*. OTU of *Prevotella* genus did not match to a species level.

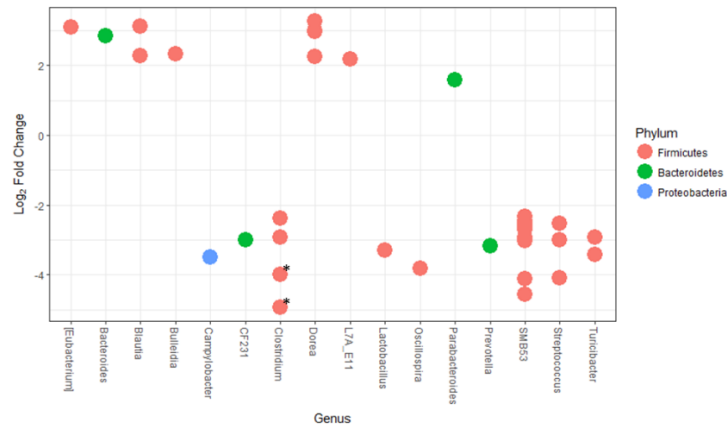

Supplementary Table S1. Description of operational taxonomic units (OTUs) mentioned in manuscript and their correlation to shedding level of *S. Typhimurium* at 7 days post infection.

| OTU          | Family            | Genus       | species     | rho  |
|--------------|-------------------|-------------|-------------|------|
| 541328       | Clostridiaceae    | Clostridium | butyricum   | -0.4 |
| 4364745      | Clostridiaceae    | Clostridium | butyricum   |      |
| 197994       | Prevotellaceae    | Prevotella  | copri       | 0.51 |
| 198502       | Prevotellaceae    | Prevotella  | copri       |      |
| 527874       | Prevotellaceae    | Prevotella  | copri       |      |
| denovo233554 | Coriobacteriaceae | Collinsella | aerofaciens | 0.44 |
| 189294       | Coriobacteriaceae | Collinsella | aerofaciens |      |

rho= coefficient from Spearman's rank correlation between relative abundance of OTUs and shedding of *S. Typhimurium* at 7 days post infection, *p* values of three coefficients < 0.05.
